# Supplementary material for: Exosomal secreted SCIMP regulates communication between macrophages and neutrophils in pneumonia
Source: PubMed Central journal article supplement (PMC10805922; doi:10.1038/s41467-024-44714-4), 2024-01-23
Supplement: 41467_2024_44714_MOESM1_ESM.pdf [file 41467_2024_44714_MOESM1_ESM.pdf]

1

## Supplementary figures and tables

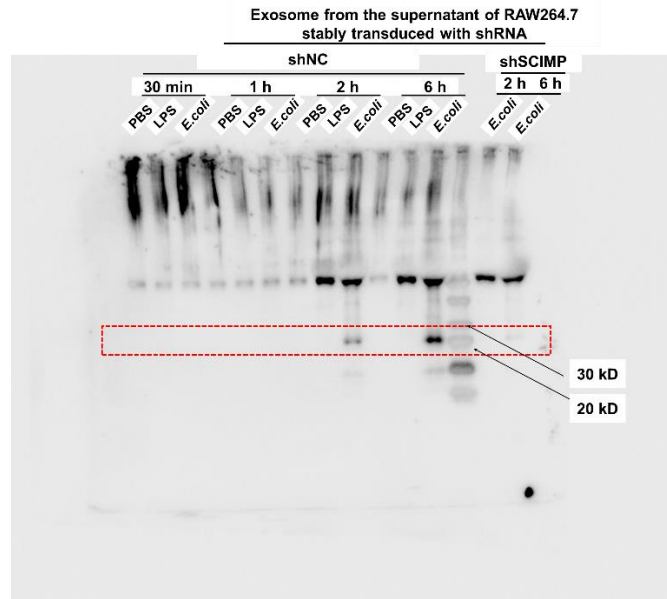

2

3 **Figure S1** The shRNA of *Scimp* was designed and stably transduced into the RAW264.7 cells as  
4 well as the negative control shRNA. The two RAW264.7 cell lines were incubated with the PBS,  
5 LPS(1  $\mu\text{g}/\text{mL}$ ), or heat-denatured *E.coli* (MOI = 100) for 0.5, 1, 2, and 6 hours, and the exosomes  
6 in the supernatant were collected and purified. The endogenous SCIMP protein expression in the  
7 exosomes from the control RAW264.7 cells incubated with PBS, LPS, or heat-denatured *E.coli* for  
8 0.5, 1, 2, and 6 hours and the *Scimp* knocked-down RAW264.7 cells incubated with heat-denatured  
9 *E.coli* for 2, and 6 hours, was detected by Western blot assay and stained with anti-SCIMP antibody.  
10 The sequence of shRNA to knock down the *Scimp* expression was  
11 “5’CCGGTCCGACAACCCTCAGCTTGGTACTCATTCAAGAGATGAGTACCAAGCTGAG  
12 GGTTGTC TTTTGG-3’” and the knocked down efficiency was evaluated by Q-PCR.

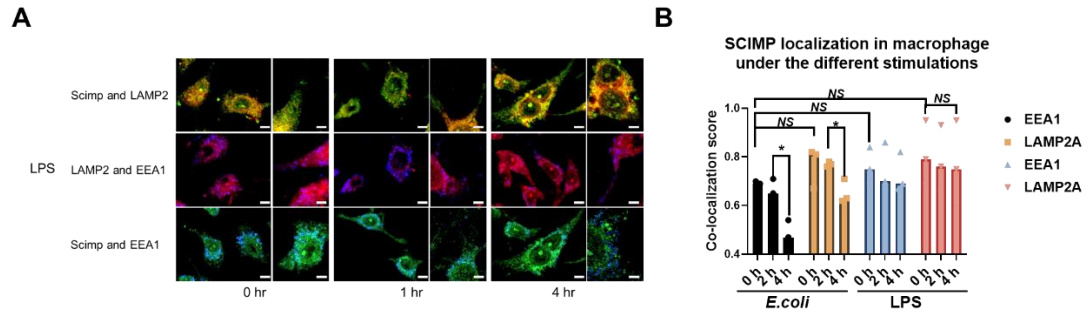

13

14 **Figure S2.** (A) After stimulation with LPS (1  $\mu$ M) for 0, 1, and 4 hours, the RAW264.7 cells stably  
 15 expressing SCIMP-GFP were fixed and permeabilized with Triton X-100 solution. Subsequently,  
 16 LAMP2A and EEA1 were stained with fluorescein-conjugated antibodies (anti-LAMP2A: red; anti-  
 17 EEA1: blue). The cellular localization of SCIMP-GFP, LAMP2A, and EEA1 was observed and  
 18 recorded using a Dragonfly Confocal Microscope (scale bar = 100  $\mu$ m). (B) Using the "Coloc2"  
 19 algorithm in "ImageJ," the colocalization of SCIMP-GFP with EEA1/LAMP2A in the cells of each  
 20 group (colocalization scores were obtained from more than ten cells in each group, n = 4) was  
 21 calculated and statistically analyzed. Source data are provided as Source Data Supplementary  
 22 Figures.

23

SCIMP<sup>exo</sup> percentage in different pathogen related pneumonia

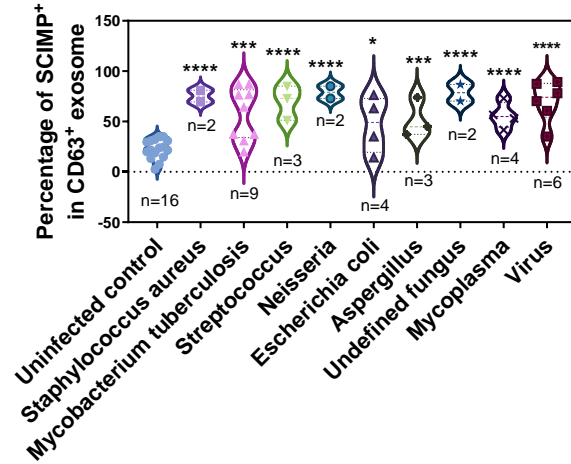

24

25 **Figure S3.** According to the infected pathogens type, the pneumonia cohort was divided into the  
 26 bacteria subgroups, fungal subgroup, virus subgroup and mycoplasma subgroup, and the percentage  
 27 of SCIMP<sup>+</sup> particles in CD63<sup>+</sup> particles in the BALF from all the pathogen subgroups was  
 28 universally higher than in the pulmonary tumor cohort. Source data are provided as Source Data  
 29 Supplementary Figures.

30

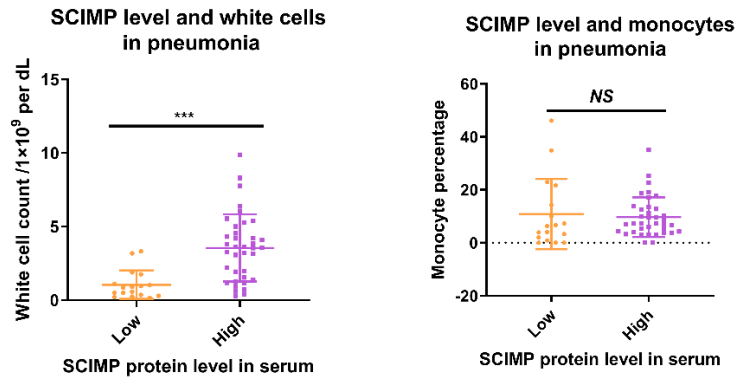

31

32 **Figure S4.** The whole white cells in the SCIMP protein level higher subgroup (>2000, n = 40 or  
 33 <2000, n = 17) were much more than that in the SCIMP protein level lower subgroup, but not  
 34 monocytes. Source data are provided as Source Data Supplementary Figures.

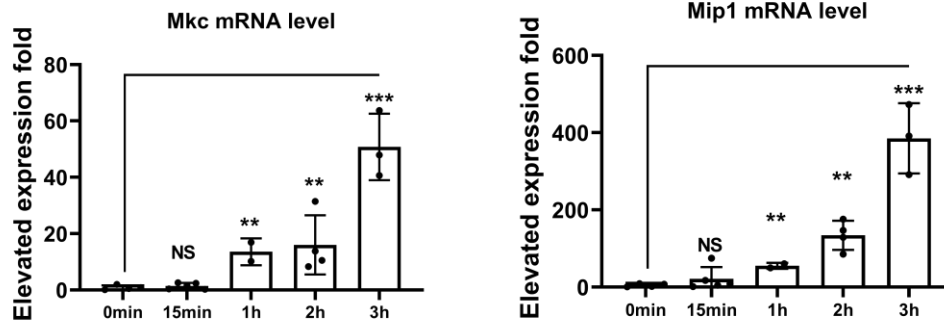

35

36 **Figure S5.** The classical chemokines, Mkc and Mip2, were observed began to be secreted into the  
 37 BALF at about 1 hour in the *E.coli*-induced ALI model (n = 4 in each group). Source data are  
 38 provided as Source Data Supplementary Figures.

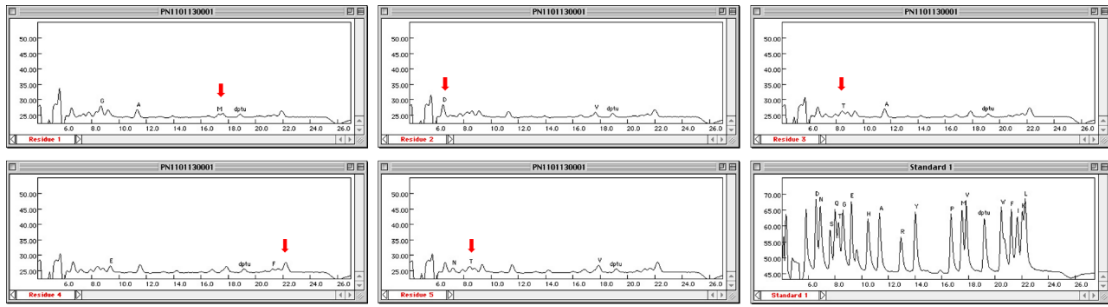

39

40 **Figure S6.** The amino acids in the mammalian expressed and purified SCIMP were measured by  
 41 mass spectrometry and the first five amino acids in the sample were shown and labelled (red arrow,  
 42 “MDTFTV”).

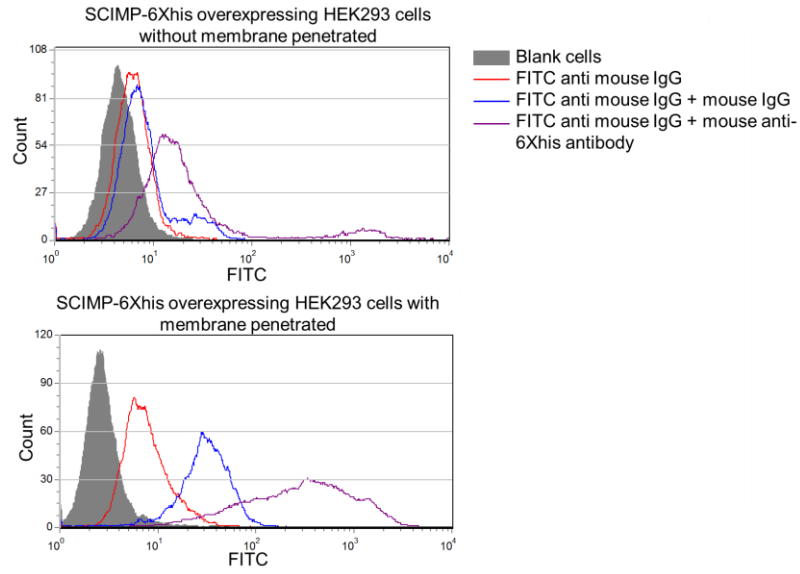

43

44 **Figure S7.** The HEK293 cells transiently transfected with SCIMP-6Xhis vector or the empty vector,  
 45 which were fixed with or without membrane penetrated by Triton-100, and the stained by the anti-  
 46 6Xhis antibody or the isotype antibody and the fluorescence (FITC) of the cells was detected by  
 47 flow cytometry.

Exosome purified from the supernatant of SCIMP-6Xhis expressing HEK293 by ultracentrifuge method

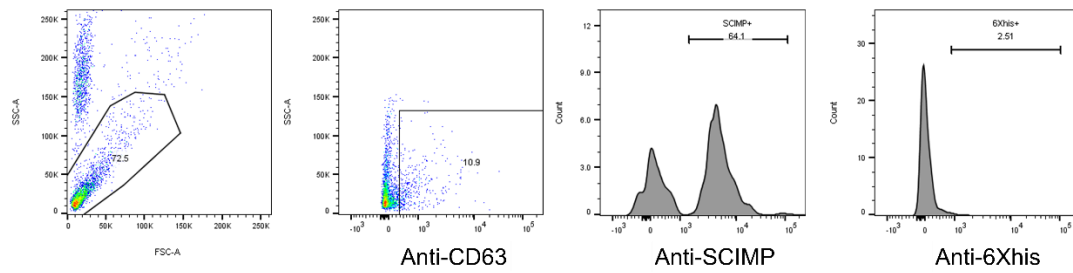

48

49 **Figure S8.** By using the FITC-SCIMP antibody and APC-anti-6×his antibody in the SCIMP<sup>exo</sup>  
50 detection kit, we found the C-terminus of SCIMP was mainly at the inside of the exosomes purified  
51 from the supernatant of SCIMP-6×his overexpressing HEK293 cells.

52



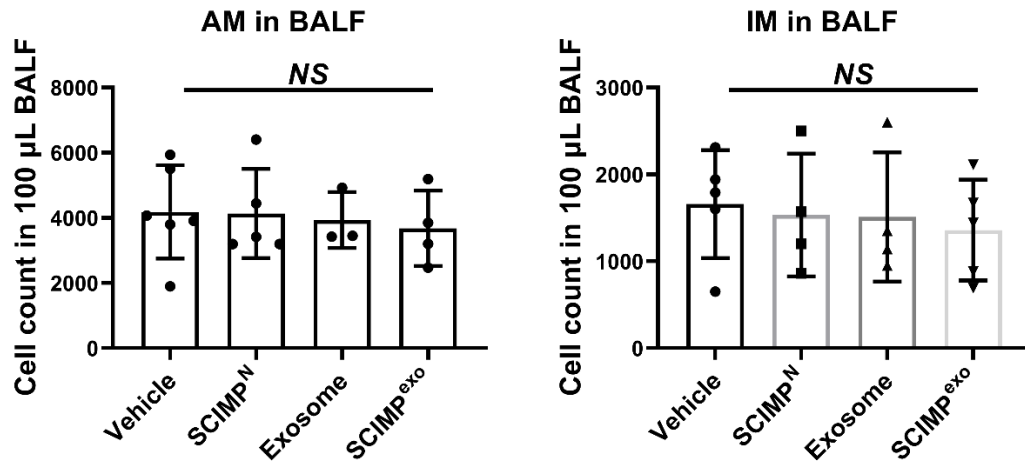

53

54 **Figure S9.** The cell counts of AMs and Infiltrating Macrophages (IMs) in the BALF at about 3-4  
 55 hours after the perfusion of SCIMP components to lung (n = 4 in each group). Source data are  
 56 provided as Source Data Supplementary Figures.

57

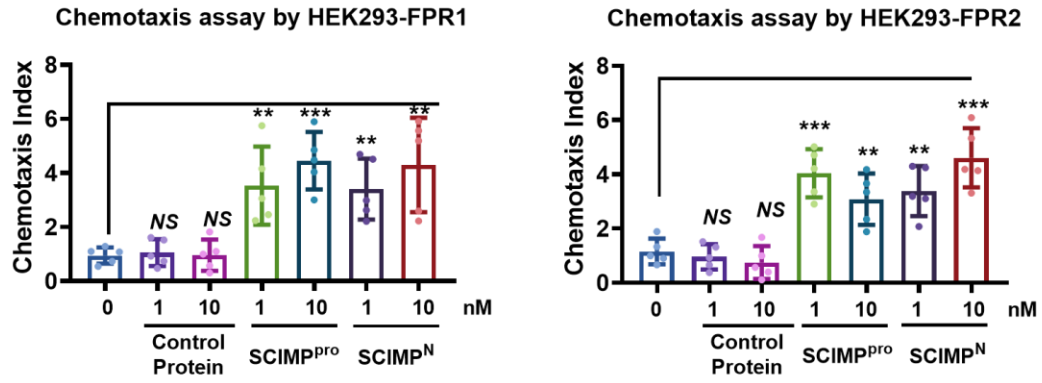

58

59 **Figure S10.** The chemotaxis activity of the control protein (prokaryotic PSMP, expressed and  
 60 purified from bacteria), SCIMP protein (expressed and purified from bacteria) and SCIMP N  
 61 terminus peptides (biosynthesized and purified by HPLC) to FPR1 or FPR2 overexpressing  
 62 HEK293 cells in chemotaxis assay (Boyden chamber, chemoattracting time was 9 hours) with the  
 63 concentration of 1, and 10 nM (n = 6 in each group). Source data are provided as Source Data  
 64 Supplementary Figures.

65

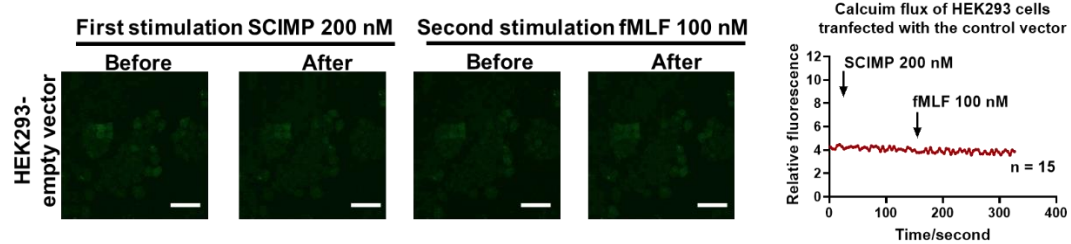

66

67 **Figure S11.** The calcium flux of the HEK293 cell transfected with the empty vector was detected  
 68 by a time coursed confocal, and at the 20 second and 180 second of the observation the 200 nM  
 69 SCIMP protein and 100 nM fMLF were added into the supernatant. Source data are provided as  
 70 Source Data Supplementary Figures.

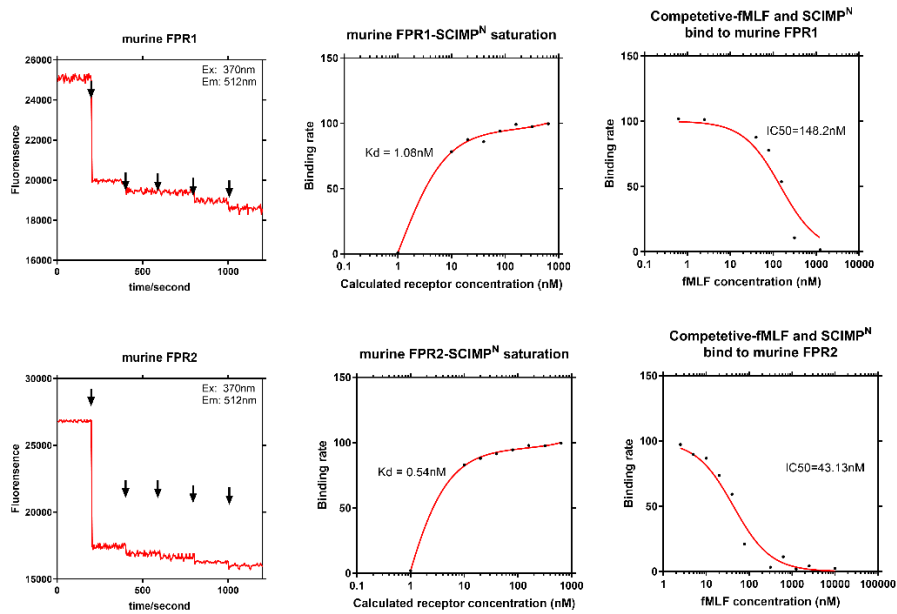

71

72 **Figure S12.** The murine SCIMP<sup>N</sup> (final concentration was 1, 10, 20, 40, 80, 160, 320, 640 nM)  
 73 were labeled by the dimer quenching probe, BODIPY FL Iodoacetamide, and then incubated with  
 74 the fixed amount of membrane component of murine FPR1/2-HEK293 and the fluorescence density  
 75 at the emission wavelength (512 nm) were measured, as well as the fMLF (5, 10, 20, 40, 80, 160,  
 76 320, 640, 1280nM) to competitive binding to the murine SCIMP<sup>N</sup> and murine FPR1/2. Source data  
 77 are provided as Source Data Supplementary Figures.

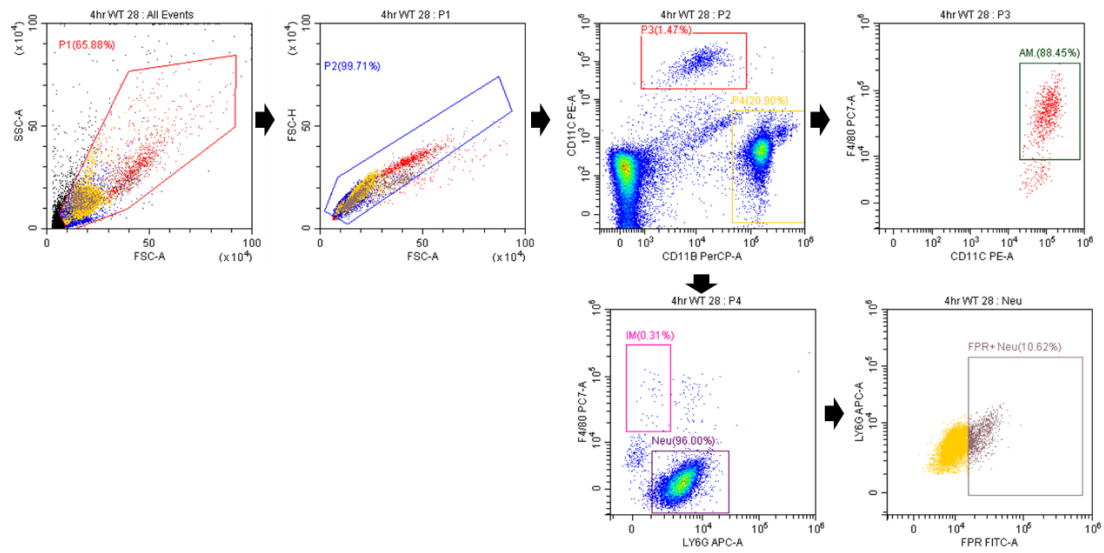

78

79 **Figure S13.** The gating strategy for neutrophils, alveolar macrophages, classical macrophages, and  
 80 FPRs<sup>+</sup> neutrophils in the BALF, stained with antibodies and detected by flow cytometry, is  
 81 presented.

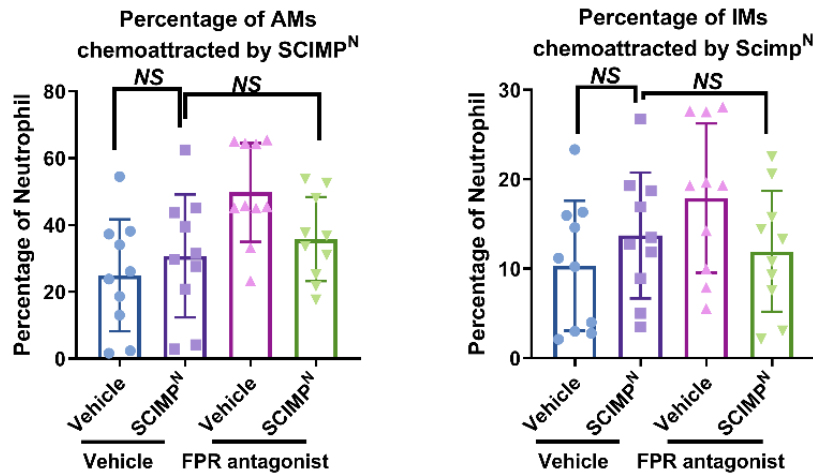

82

83 **Figure S14.** The chemotaxis of the Scimp N peptides and the vehicle (PBS) with or without the  
 84 pretreatment of FPR antagonist (CsH, 50 µg per mouse) to the infiltrated classical macrophages  
 85 (IMs, CD11b<sup>+</sup>CD11c<sup>+</sup>F4/80<sup>+</sup>) or resident alveolar macrophages (AMs, CD11b<sup>+</sup>CD11c<sup>+</sup>F4/80<sup>+</sup>) in  
 86 the pulmonary of the C57 mice was measured by the flow-cytometry (n = 8 in each group). Source  
 87 data are provided as Source Data Supplementary Figures.

88

Peptide1#: MDTFTVQDSTAMSWWRNN  
Peptide2#: AKPLKHKQV  
Peptide3#: NESPVQLPPLP  
Peptide4#: QEAPSQPPATYSLVNKVK  
Peptide5#: TVSIPSYI

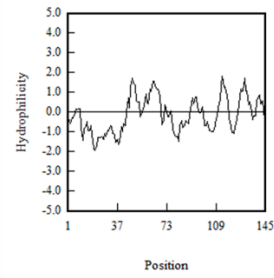

89

90 **Figure S15.** The peptides sequence from human SCIMP that were predicted to have high immune  
91 epitope, and “Peptide1#” is the N terminus of human SCIMP (left); The hydroplicity of each  
92 amino acid in the human SCIMP protein were calculated (right).

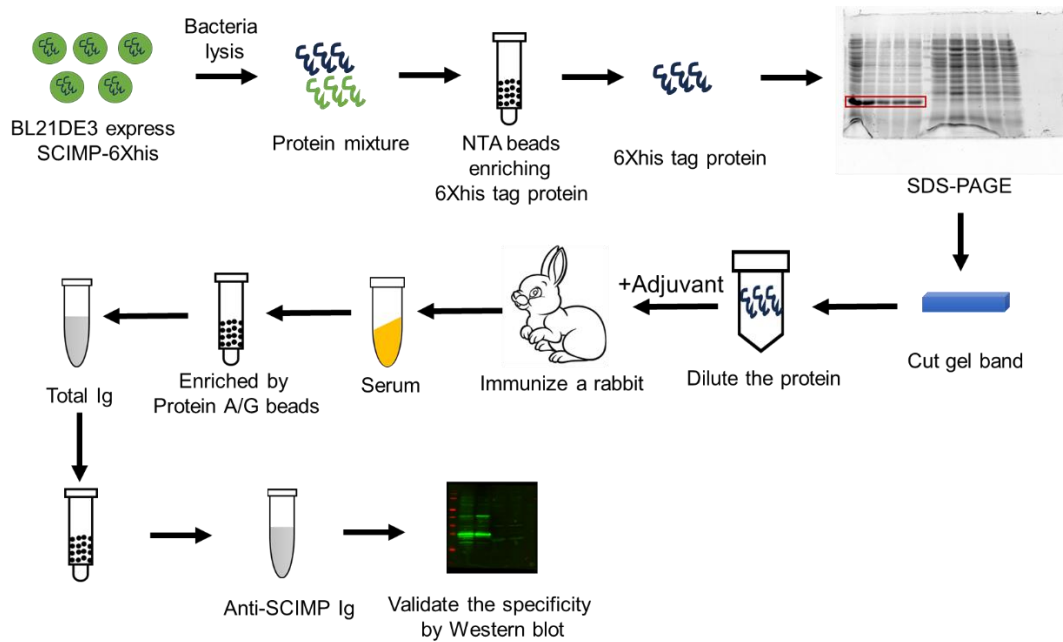

93

94 **Figure S16.** The processes to produce, purify, and evaluate the SCIMP antibody from immunized  
 95 rabbit serum are schematically shown. The SCIMP antibody was generated by immunizing a rabbit  
 96 with the purified prokaryotic SCIMP protein. After obtaining the SCIMP-immunized rabbit serum,  
 97 Protein A/G-conjugated beads were used to extract the total antibody from the serum. Subsequently,  
 98 the SCIMP-sourced peptides (listed in **Figure S14**) were conjugated to CNBr-activated Sepharose  
 99 4B and used to purify the antibody recognizing the peptides. The specificity of the SCIMP-specific  
 100 antibody was evaluated by western blotting, demonstrating that the SCIMP antibody could  
 101 recognize the exogenous SCIMP protein expressed by bacteria (BL21DE3) but not the lysate of  
 102 bacteria with an empty vector transduced. The purified SCIMP antibody was then used in  
 103 subsequent experiments.



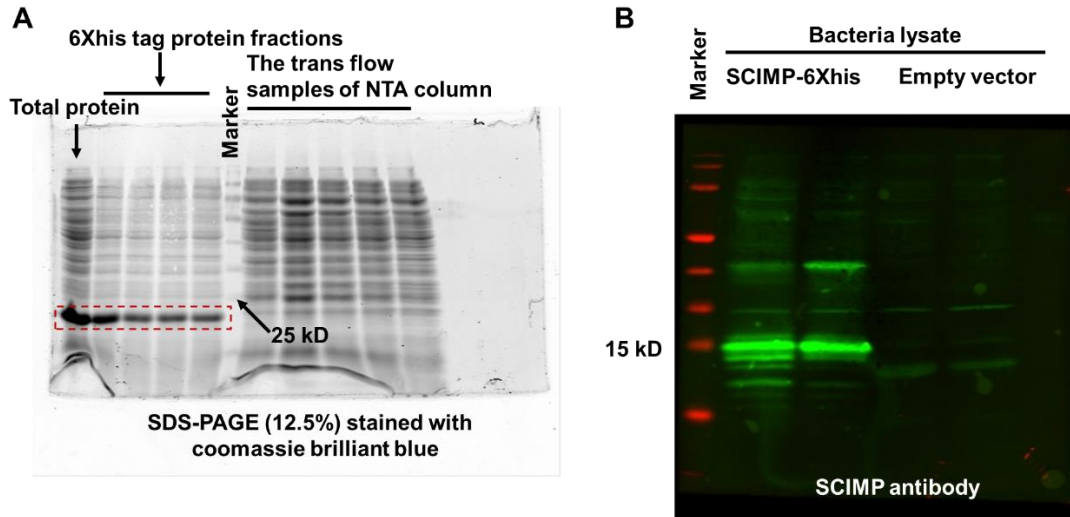

104

105 **Figure S17.** The human SCIMP-6×His recombinant protein was expressed in bacteria (BL21DE3),  
 106 and the SCIMP-6×His protein in the bacterial lysate was purified using NTA Sepharose. The protein  
 107 in each fraction during the purification process was analyzed by SDS-PAGE and stained with  
 108 Coomassie blue (A). Additionally, the SCIMP-6×His protein in the bacterial lysate samples  
 109 expressing SCIMP-6×His or transduced with an empty vector (pET32a) was probed with the  
 110 purified SCIMP antibody in a Western blot (B).

111 **Table S1. Basic clinical features of BALF samples providing patients**

| Clinical feature                       | infected<br>cohort<br>(N=36) | uninfected<br>cohort<br>(N=20) |
|----------------------------------------|------------------------------|--------------------------------|
| Age (year), median (range)             | 55 (29~78)                   | 67 (37~78)                     |
| Gender, male percentage (%)            | 23 (63.8%)                   | 14 (70.0%)                     |
| Basic disease, count (%)               |                              |                                |
| No                                     | 15(41.7%)                    | 15 (75%)                       |
| COPD                                   | 5(13.9%)                     | 0                              |
| Pulmonary tuberculosis                 | 2(5.6%)                      | 0                              |
| Bronchiectasis                         | 1(2.6%)                      | 0                              |
| Post-transplant status of solid organs | 4(11.1%)                     | 0                              |
| SLE                                    | 2(5.6%)                      | 0                              |
| DM                                     | 5(13.9%)                     | 5(25%)                         |
| Nephrotic syndrome                     | 2(5.6%)                      | 0                              |

112 \* No: no basic disease, COPD: Chronic obstructive pulmonary disease, SLE: Systemic lupus  
 113 erythematosus, DM: Dermatomyositis.

114

115 **Table S2. Basic clinical features of serum samples providing patients**

| Clinical feature                | Pneumonia cohort<br>(N = 57) | Control Cohort<br>(N = 50) |
|---------------------------------|------------------------------|----------------------------|
| Age (year), median (range)      | 33 (9~60)                    | 37 (7~60)                  |
| Gender, male + female           | 32+25                        | 30+20                      |
| Percentage (%)                  | (56.1%+43.9%)                | (60.0%+40.0%)              |
| <b>Basic disease, count (%)</b> |                              |                            |
| AML                             | 32(56.1%)                    | 29(58.0%)                  |
| ALL                             | 4(7.0%)                      | 4(8.0%)                    |
| MDS                             | 14(24.6%)                    | 11(22.0%)                  |
| CML                             | 1(1.8%)                      | 1(2.0%)                    |
| SAA                             | 5(8.8%)                      | 4(8.0%)                    |
| PMF                             | 1(1.8%)                      | 1(2.0%)                    |

116 \*AML: Acute myeloid leukemia; ALL: Acute lymphoblastic leukemia; MDS: Myelodysplastic  
 117 syndromes; CML: Chronic myeloid leukemia; SAA: Severe aplastic anemia; PMF: Primary  
 118 myelofibrosis.

119
